# Supplementary material for: Valuation of firms with multiple business units
Source: Springer Nature journal article supplement (doi:10.1007/s11573-020-01010-z), 2020-10-24
Supplement: MOESM1 [file 18518960]

# Valuation of Firms with Multiple Business Units

## Technical Appendix

### Proof of Lemma 1

Unit A is characterized by a constant return  $ROIC^A$  and net investment rate  $n^A$ . Therefore, the expected invested capital, NOPLAT, and the net investments in this unit uniformly grow at the constant nominal rate  $g^A$  which yields the expressions in Lemma 1 a).

To determine the expected accounting measures in unit B, we must consider the effects of the cross-unit investments. At time  $t$ , a share  $n^{AB}$  of unit A's NOPLAT after intra-unit investments is diverted to unit B. This implies an expected increase in unit B's invested capital by

$$\bar{n}^{AB} \cdot E[\widetilde{NOPLAT}_t^A]. \quad (A.1)$$

In unit B, these cross-unit investments yield a return of  $ROIC^B$  and are subject to periodic reinvestments according to the rate  $n^B$ . They increase unit B's NOPLAT in all subsequent periods. The NOPLAT generated in unit B grows at the rate  $g^B$ . Thus, the cross-unit investments at time  $t$  cause the following incremental NOPLAT at time  $s > t$ :

$$\begin{aligned} E[\widetilde{NOPLAT}_s^{B,(t)}] &= ROIC^B \cdot \bar{n}^{AB} \cdot E[\widetilde{NOPLAT}_t^A] \cdot (1 + g^B)^{s-(t+1)} \\ &= ROIC^B \cdot \bar{n}^{AB} \cdot E[\widetilde{NOPLAT}_1^A] \cdot (1 + g^A)^{t-1} \cdot (1 + g^B)^{s-(t+1)}. \end{aligned} \quad (A.2)$$

To determine the total NOPLAT of unit B at time  $t$ , we consider the NOPLAT generated by the initial capital  $E[\widetilde{IC}_0^B]$ , as well as the NOPLAT from all previous cross-unit investments according to (A.2):

$$\begin{aligned} E[\widetilde{NOPLAT}_t^B] &= ROIC^B \cdot E[\widetilde{IC}_0^B] \cdot (1 + g^B)^{t-1} + \sum_{s=1}^{t-1} E[\widetilde{NOPLAT}_t^{B,(s)}] \\ &= ROIC^B \cdot E[\widetilde{IC}_0^B] \cdot (1 + g^B)^{t-1} \\ &\quad + \bar{n}^{AB} \cdot ROIC^B \cdot ROIC^A \cdot E[\widetilde{IC}_0^A] \cdot \frac{(1 + g^B)^{t-1} - (1 + g^A)^{t-1}}{g^B - g^A}. \end{aligned} \quad (A.3)$$

The net investments at time  $t$  are the sum of the intra-unit and cross-unit investments:

$$\begin{aligned}
E[\widetilde{NI}_t^B] &= n^B \cdot E[\widetilde{NOPLAT}_t^B] + \bar{n}^{AB} \cdot E[\widetilde{NOPLAT}_t^A] \\
&= n^B \cdot E[\widetilde{NOPLAT}_1^B] \cdot (1 + g^B)^{t-1} \\
&\quad + \bar{n}^{AB} \cdot E[\widetilde{NOPLAT}_1^A] \cdot \frac{g^B \cdot (1 + g^B)^{t-1} - g^A \cdot (1 + g^A)^{t-1}}{g^B - g^A}.
\end{aligned} \tag{A.4}$$

Finally, the invested capital of unit B at time  $t$  is the sum of the initial capital and all subsequent net investments:

$$\begin{aligned}
E[\widetilde{IC}_t^B] &= E[\widetilde{IC}_0^B] + \sum_{s=1}^t E[\widetilde{NI}_s^B] \\
&= E[\widetilde{IC}_0^B] \cdot (1 + g^B)^t + \bar{n}^{AB} \cdot E[\widetilde{NOPLAT}_1^A] \cdot \frac{(1 + g^B)^t - (1 + g^A)^t}{g^B - g^A}.
\end{aligned} \tag{A.5}$$

### Proof of Proposition 1

Based on the results of Lemma 1, we obtain the following solutions for the expected NOPLAT, net investments, invested capital, and free cash flow at the firm level:

$$\begin{aligned}
E[\widetilde{NOPLAT}_t] &= E[\widetilde{NOPLAT}_t^A] + E[\widetilde{NOPLAT}_t^B] \\
&= \frac{(n^B - \bar{n}^{AB}) \cdot ROIC^B - n^A \cdot ROIC^A}{g^B - g^A} \cdot ROIC^A \cdot E[\widetilde{IC}_0^A] \cdot (1 + g^A)^{t-1} \\
&\quad + ROIC^B \cdot \left( \frac{ROIC^A \cdot \bar{n}^{AB}}{g^B - g^A} \cdot E[\widetilde{IC}_0^A] + E[\widetilde{IC}_0^B] \right) \cdot (1 + g^B)^{t-1},
\end{aligned} \tag{A.6}$$

$$\begin{aligned}
E[\widetilde{NI}_t] &= (n^A + \bar{n}^{AB}) \cdot E[\widetilde{NOPLAT}_t^A] + n^B \cdot E[\widetilde{NOPLAT}_t^B] \\
&= \frac{n^A \cdot g^B - (n^A + \bar{n}^{AB}) \cdot g^A}{g^B - g^A} \cdot ROIC^A \cdot E[\widetilde{IC}_0^A] \cdot (1 + g^A)^{t-1} \\
&\quad + g^B \cdot \left( \frac{\bar{n}^{AB} \cdot ROIC^A}{g^B - g^A} \cdot E[\widetilde{IC}_0^A] + E[\widetilde{IC}_0^B] \right) \cdot (1 + g^B)^{t-1},
\end{aligned} \tag{A.7}$$

$$\begin{aligned}
E[\widetilde{IC}_t] &= E[\widetilde{IC}_0^A] + E[\widetilde{IC}_0^B] + \sum_{s=1}^t E[\widetilde{NI}_s] \\
&= E[\widetilde{IC}_0^A] + E[\widetilde{IC}_0^B] + \frac{n^A \cdot g^B - (n^A + \bar{n}^{AB}) \cdot g^A}{(g^B - g^A) \cdot g^A} \cdot ROIC^A \cdot E[\widetilde{IC}_0^A] \cdot ((1 + g^A)^t - 1) \\
&\quad + \left( \frac{\bar{n}^{AB} \cdot ROIC^A}{g^B - g^A} \cdot E[\widetilde{IC}_0^A] + E[\widetilde{IC}_0^B] \right) \cdot ((1 + g^B)^t - 1),
\end{aligned} \tag{A.8}$$

$$\tag{A.9}$$

$$\begin{aligned}
E[\widetilde{FCF}_t] &= E[\widetilde{NOPLAT}_t] - E[\widetilde{NI}_t] \\
&= (1-n^A) \cdot \frac{(n^B - n^{AB}) \cdot ROIC^B - (1-n^{AB}) \cdot g^A}{g^B - g^A} \cdot ROIC^A \cdot E[\widetilde{IC}_0^A] \cdot (1+g^A)^{t-1} \\
&\quad + ROIC^B \cdot (1-n^B) \cdot \left( \frac{ROIC^A \cdot \bar{n}^{AB} \cdot E[\widetilde{IC}_0^A]}{g^B - g^A} + E[\widetilde{IC}_0^B] \right) \cdot (1+g^B)^{t-1}.
\end{aligned} \tag{A.10}$$

These results can be used to determine the expected absolute increases of the expected accounting measures:

$$\begin{aligned}
&E[\widetilde{NOPLAT}_{t+1}] - E[\widetilde{NOPLAT}_t] \\
&= \frac{(n^B - \bar{n}^{AB}) \cdot ROIC^B - n^A \cdot ROIC^A}{g^B - g^A} \cdot g^A \cdot ROIC^A \cdot E[\widetilde{IC}_0^A] \cdot (1+g^A)^{t-1} \\
&\quad + ROIC^B \cdot \left( \frac{ROIC^A \cdot \bar{n}^{AB}}{g^B - g^A} \cdot E[\widetilde{IC}_0^A] + E[\widetilde{IC}_0^B] \right) \cdot g^B \cdot (1+g^B)^{t-1},
\end{aligned} \tag{A.11}$$

$$\begin{aligned}
E[\widetilde{NI}_{t+1}] - E[\widetilde{NI}_t] &= \frac{n^A \cdot g^B - (n^A + \bar{n}^{AB}) \cdot g^A}{g^B - g^A} \cdot g^A \cdot ROIC^A \cdot E[\widetilde{IC}_0^A] \cdot (1+g^A)^{t-1} \\
&\quad + g^B \cdot \left( \frac{\bar{n}^{AB} \cdot ROIC^A}{g^B - g^A} \cdot E[\widetilde{IC}_0^A] + E[\widetilde{IC}_0^B] \right) \cdot g^B \cdot (1+g^B)^{t-1},
\end{aligned} \tag{A.12}$$

$$E[\widetilde{IC}_{t+1}] - E[\widetilde{IC}_t] = E[\widetilde{NI}_{t+1}], \tag{A.13}$$

$$\begin{aligned}
&E[\widetilde{FCF}_{t+1}] - E[\widetilde{FCF}_t] \\
&= ROIC^A \cdot (1-n^A) \cdot E[\widetilde{IC}_0^A] \cdot \frac{(n^B - n^{AB}) \cdot ROIC^B - (1-n^{AB}) \cdot g^A}{g^B - g^A} \cdot g^A \cdot (1+g^A)^{t-1} \\
&\quad + ROIC^B \cdot (1-n^B) \cdot \left( \frac{ROIC^A \cdot n^{AB} \cdot (1-n^A) \cdot E[\widetilde{IC}_0^A]}{g^B - g^A} + E[\widetilde{IC}_0^B] \right) \cdot g^B \cdot (1+g^B)^{t-1}.
\end{aligned} \tag{A.14}$$

These results can be used to determine the growth rates (7) and the firm's ROIC and payout ratio (8) and to identify the limits according to Proposition 1.

### Proof of Corollary 1

The derivatives of the weights  $\lambda^{ROIC}$  and  $\lambda^q$  are given by:

$$\frac{\partial \lambda^{ROIC}}{\partial n^{AB}} = \frac{(g^B - g^A) \cdot (1 - n^A) \cdot ROIC^A}{(g^A - g^B + \bar{n}^{AB} \cdot ROIC^A)^2} \leq 0 \Leftrightarrow g^A \geq g^B, \tag{A.15}$$

$$\frac{\partial \lambda^{ROIC}}{\partial ROIC^A} = \frac{\bar{n}^{AB} \cdot g^B}{(g^A - g^B + \bar{n}^{AB} \cdot ROIC^A)^2} \geq 0, \tag{A.16}$$

$$\frac{\partial \lambda^{ROIC}}{\partial ROIC^B} = -\frac{\bar{n}^{AB} \cdot (1 - n^A) \cdot n^B \cdot ROIC^A}{(g^A - g^B + \bar{n}^{AB} \cdot ROIC^A)^2} \leq 0, \quad (\text{A.17})$$

$$\frac{\partial \lambda^{ROIC}}{\partial n^A} = \frac{(ROIC^A - g^B) \cdot n^{AB} \cdot ROIC^A}{(g^A - g^B + \bar{n}^{AB} \cdot ROIC^A)^2} \geq 0 \Leftrightarrow ROIC^A \geq g^B, \quad (\text{A.18})$$

$$\frac{\partial \lambda^{ROIC}}{\partial n^B} = -\frac{\bar{n}^{AB} \cdot ROIC^A \cdot ROIC^B}{(g^A - g^B + \bar{n}^{AB} \cdot ROIC^A)^2} \leq 0, \quad (\text{A.19})$$

$$\frac{\partial \lambda^q}{\partial n^{AB}} = \frac{(g^B - g^A) \cdot (1 - n^A) \cdot ROIC^B}{(g^A - g^B + \bar{n}^{AB} \cdot ROIC^B)^2} \leq 0 \Leftrightarrow g^A \geq g^B, \quad (\text{A.20})$$

$$\frac{\partial \lambda^q}{\partial ROIC^A} = \frac{n^A \cdot \bar{n}^{AB} \cdot ROIC^B}{(g^A - g^B + \bar{n}^{AB} \cdot ROIC^B)^2} \geq 0, \quad (\text{A.21})$$

$$\frac{\partial \lambda^q}{\partial ROIC^B} = -\frac{\bar{n}^{AB} \cdot g^A}{(g^A - g^B + \bar{n}^{AB} \cdot ROIC^B)^2} \leq 0, \quad (\text{A.22})$$

$$\frac{\partial \lambda^q}{\partial n^A} = \frac{(ROIC^A - g^B) \cdot ROIC^B \cdot n^{AB}}{(g^A - g^B + \bar{n}^{AB} \cdot ROIC^B)^2} \geq 0 \Leftrightarrow ROIC^A \geq g^B, \quad (\text{A.23})$$

$$\frac{\partial \lambda^q}{\partial n^B} = -\frac{n^{AB} \cdot (1 - n^A) \cdot ROIC^{B2}}{(g^A - g^B + \bar{n}^{AB} \cdot ROIC^B)^2} \leq 0. \quad (\text{A.24})$$

As we study the case  $g^B < g^A$ , the expressions confirm the results of Corollary 1.

## Proof of Proposition 2

The stand-alone values of the units are determined according to benchmark case (a). To determine the net value contribution of the cross-unit investments, consider their effects on the free cash flow. The cross-unit investments at time  $t$  reduce the free cash flow by the retained amount (A.1) but generate an incremental NOPLAT according to (A.2). A share  $1 - n^B$  of this NOPLAT is distributed to shareholders and debtors. Thus, the cross-unit investments at time  $t$  imply the following value  $E[\tilde{V}_t^{AB,(t)}]$  of future cash flow increases:

$$\begin{aligned} E[\tilde{V}_t^{AB,(t)}] &= \sum_{s=t+1}^{\infty} \frac{(1 - n^B) \cdot E[\widetilde{NOPLAT}_s^{B,(t)}]}{(1 + k)^{s-t}} \\ &= \frac{(1 - n^B) \cdot ROIC^B \cdot \bar{n}^{AB} \cdot E[\widetilde{NOPLAT}_t^A]}{k - g^B} \\ &= E[\tilde{V}_1^{AB,(1)}] \cdot (1 + g^A)^{t-1}. \end{aligned} \quad (\text{A.25})$$

The net contribution  $E[\tilde{V}_0^{AB}]$  of the cross-unit investments combines the value-reducing

effect (A.1) and the value-enhancing effect (A.24):

$$\begin{aligned} E[\tilde{V}_0^{AB}] &= \sum_{t=1}^{\infty} \frac{(E[\tilde{V}_1^{AB,(1)}] - \bar{n}^{AB} \cdot E[\widetilde{NOPLAT}_1^A]) \cdot (1 + g^A)^{t-1}}{(1 + k)^t} \\ &= \frac{(ROIC^B - k) \cdot \bar{n}^{AB} \cdot E[\widetilde{NOPLAT}_1^A]}{(k - g^A) \cdot (k - g^B)}. \end{aligned} \quad (\text{A.26})$$

### Proof of Corollaries 2

The derivatives of the net value contribution of cross-unit investments  $E[\tilde{V}_0^{AB}]$  are

$$\frac{\partial E[\tilde{V}_0^{AB}]}{\partial n^{AB}} = \frac{(ROIC^B - k) \cdot (1 - n^A) \cdot ROIC^A \cdot E[\widetilde{IC}_0^A]}{(k - g^A) \cdot (k - g^B)} \geq 0, \quad (\text{A.27})$$

$$\frac{\partial E[\tilde{V}_0^{AB}]}{\partial ROIC^A} = \frac{(ROIC^B - k) \cdot k \cdot \bar{n}^{AB} \cdot E[\widetilde{IC}_0^A]}{(k - g^A)^2 \cdot (k - g^B)} \geq 0, \quad (\text{A.28})$$

$$\frac{\partial E[\tilde{V}_0^{AB}]}{\partial ROIC^B} = \frac{k \cdot \bar{n}^{AB} \cdot (1 - n^B) \cdot ROIC^A \cdot E[\widetilde{IC}_0^A]}{(k - g^A) \cdot (k - g^B)^2} \geq 0, \quad (\text{A.29})$$

$$\frac{\partial E[\tilde{V}_0^{AB}]}{\partial n^A} = \frac{(ROIC^B - k) \cdot (ROIC^A - k) \cdot n^{AB} \cdot ROIC^A \cdot E[\widetilde{IC}_0^A]}{(k - g^A)^2 \cdot (k - g^B)} \geq 0, \quad (\text{A.30})$$

$$\frac{\partial E[\tilde{V}_0^{AB}]}{\partial n^B} = \frac{(ROIC^B - k) \cdot \bar{n}^{AB} \cdot ROIC^A \cdot ROIC^B \cdot E[\widetilde{IC}_0^A]}{(k - g^A) \cdot (k - g^B)^2} \geq 0, \quad (\text{A.31})$$

$$\frac{\partial E[\tilde{V}_0^{AB}]}{\partial k} = -\frac{(k - g^A) \cdot (k - g^B) + (ROIC^B - k) \cdot (2 \cdot k - g^A - g^B)}{(k - g^A) \cdot (k - g^B)} \cdot \bar{n}^{AB} \cdot ROIC^A \cdot E[\widetilde{IC}_0^A] \leq 0. \quad (\text{A.32})$$

### Proof of Corollary 3

The results in a) are obtained from Lemma 1 using definition (9):

$$\begin{aligned} E[\widetilde{RI}_t^A] &= E[\widetilde{NOPLAT}_t^A] - k \cdot E[\widetilde{IC}_{t-1}^A] \\ &= (ROIC^i - k) \cdot E[\widetilde{IC}_0^i]. \end{aligned} \quad (\text{A.33})$$

$$\begin{aligned} E[\widetilde{RI}_t^B] &= E[\widetilde{NOPLAT}_t^B] - k \cdot E[\widetilde{IC}_{t-1}^B] \\ &= (ROIC^B - k) \cdot E[\widetilde{IC}_{t-1}^B] \\ &= (ROIC^B - k) \\ &\quad \cdot \left( E[\widetilde{IC}_0^B] \cdot (1 + g^B)^{t-1} + \bar{n}^{AB} \cdot E[\widetilde{NOPLAT}_1^A] \cdot \frac{(1 + g^B)^{t-1} - (1 + g^A)^{t-1}}{g^B - g^A} \right). \end{aligned} \quad (\text{A.34})$$

The residual income approach in b) follows the same logic as the proof of Proposition 2. First, consider a setting without cross-unit investments. In this case, the expected residual income of business unit  $i \in \{A, B\}$  at time  $t = 1$  is

$$\begin{aligned} E[\widetilde{RI}_1^i] &= E[\widetilde{NOPLAT}_1^i] - k \cdot E[\widetilde{IC}_0^i] \\ &= (ROIC^i - k) \cdot E[\widetilde{IC}_0^i]. \end{aligned} \quad (\text{A.35})$$

The residual income grows at the constant rate  $g^i$ . This immediately implies the expression  $E[\widetilde{MVA}_0^i]$  for the stand-alone MVA of unit  $i$ . The component  $E[\widetilde{MVA}_0^{AB}]$  measures the adjustment of the residual incomes attributable to the cross-unit investments. Consider the expected cross-unit investments (A.1). The investments in business unit B are subject to the constant return  $ROIC^B$  and the intra-unit investment rate  $n^B$ . They generate the following additional invested capital at time  $s \geq t$ :

$$E[\widetilde{IC}_s^{B,(t)}] = \bar{n}^{AB} \cdot E[\widetilde{NOPLAT}_t^A] \cdot (1 + g^B)^{s-t}. \quad (\text{A.36})$$

Moreover, the incremental NOPLAT resulting from the cross-unit investment at time  $t$  is given by (A.2). Using (A.2) and (A.35), we obtain the following expected residual income in period  $s$  as a result of the cross-unit investment at time  $t$ :

$$\begin{aligned} E[\widetilde{RI}_s^{B,(t)}] &= E[\widetilde{NOPLAT}_s^{B,(t)}] - k \cdot E[\widetilde{IC}_{s-1}^{B,(t)}] \\ &= (ROIC^B - k) \cdot \bar{n}^{AB} \cdot E[\widetilde{NOPLAT}_t^A] \cdot (1 + g^B)^{s-(t+1)}. \end{aligned} \quad (\text{A.37})$$

Thus, the MVA of the cross-unit investments at time  $t$  is given by:

$$\begin{aligned} E[\widetilde{MVA}_t^{B,(t)}] &= \sum_{s=t+1}^{\infty} \frac{E[\widetilde{RI}_s^{B,(t)}]}{(1+k)^{s-t}} \\ &= \frac{ROIC^B - k}{k - g^B} \cdot \bar{n}^{AB} \cdot E[\widetilde{NOPLAT}_1^A] \cdot (1 + g^A)^{t-1}. \end{aligned} \quad (\text{A.38})$$

The MVA of the cross-unit investments  $E[\widetilde{MVA}_0^{AB}]$  is the present value of these components:

$$\begin{aligned} E[\widetilde{MVA}_0^{AB}] &= \sum_{t=1}^{\infty} \frac{E[\widetilde{MVA}_t^{B,(t)}]}{(1+k)^t} \\ &= \frac{\bar{n}^{AB} \cdot ROIC^A \cdot (ROIC^B - k)}{(k - g^A) \cdot (k - g^B)} \cdot E[\widetilde{IC}_0^A]. \end{aligned} \quad (\text{A.39})$$

### Proof of Proposition 3

The total ROIC at time  $t$  can be determined from the NOPLAT (A.6) and the invested capital (A.8). This expression is time-invariant if

$$(1 - n^{AB}) \cdot (1 - n^A) = 1 - n^B. \quad (\text{A.40})$$

Analogously, we find that the growth rate of the free cash flow (A.9) is constant if

$$(1 - n^{AB}) \cdot \left(1 - \frac{g^A}{ROIC^B}\right) = 1 - n^B. \quad (\text{A.41})$$

### Proof of Corollary 4

With homogenous rentability  $ROIC = ROIC^A = ROIC^B$ , the conditions for a constant payout and constant growth strategy according to Proposition 3 coincide:

$$n^{AB} = \frac{n^B - n^A}{1 - n^A} = \frac{g^B - g^A}{ROIC - g^A}. \quad (\text{A.42})$$

The simplified formula in Corollary 4 is obtained by substituting this result into the general valuation formula in Proposition 2.

## References

- Koller T, Goedhart M, Wessels D (2015) Valuation: measuring and managing the value of companies. 6th edn. John Wiley & Sons, Hoboken
- Meitner M (2013) Multi-period asset lifetimes and accounting-based equity valuation: take care with constant-growth terminal value models! *Abacus* 49(3):340–366
